# Supplementary material for: Theoretical Study of Hydrogen Production from Ammonia Borane Catalyzed by Metal and Non-Metal Diatom-Doped Cobalt Phosphide
Source: MDPI journal article supplement (doi:10.3390/molecules27238206), 2022-11-24
Supplement: s1 [file s1]

# Theoretical Study of Hydrogen Production from Ammonia Borane Catalyzed by Metal and Non-metal Diatom-doped Cobalt Phosphide

Dong-Heng Li, Qiao-Mei Li, Shuang-Ling Qi, Hai-Chuan Qin, Xiao-Qin Liang and Laicai Li \*

College of Chemistry and Material Science, Sichuan Normal University, Chengdu 610068, China

\* Correspondence: lilcmail@163.com

## Table of Contents

|                                                                                                           |                                     |
|-----------------------------------------------------------------------------------------------------------|-------------------------------------|
| Additional Figures .....                                                                                  | 2                                   |
| Stable adsorption structures of and electron density maps                                                 | <b>Error! Bookmark not defined.</b> |
| The process of $\text{NH}_3\text{BH}_3$ hydrogen production catalyzed by $\text{CoP}$                     | <b>Error! Bookmark not defined.</b> |
| The process of $\text{NH}_3\text{BH}_3$ hydrogen production catalyzed by $\text{CoP}_{\text{Ni-N}}$ ..... | 3                                   |
| The process of $\text{NH}_3\text{BH}_3$ hydrogen production catalyzed by $\text{CoP}_{\text{Ga-N}}$ ..... | 3                                   |
| The process of $\text{NH}_3\text{BH}_3$ hydrogen production catalyzed by $\text{CoP}_{\text{Ni-S}}$ ..... | 4                                   |
| The energy level diagram of the reaction of five catalysts .....                                          | 4                                   |
| Density of states (DOS) and energy band structure .....                                                   | 7                                   |
| Additional Tables                                                                                         |                                     |
| Relevant structural parameters related to the hydrogen evolution reaction .....                           | 8                                   |
| Relevant energies and activation energies hydrogen evolution in reaction .....                            | 10                                  |

## Additional Figures

### Stable adsorption structures and electron density maps

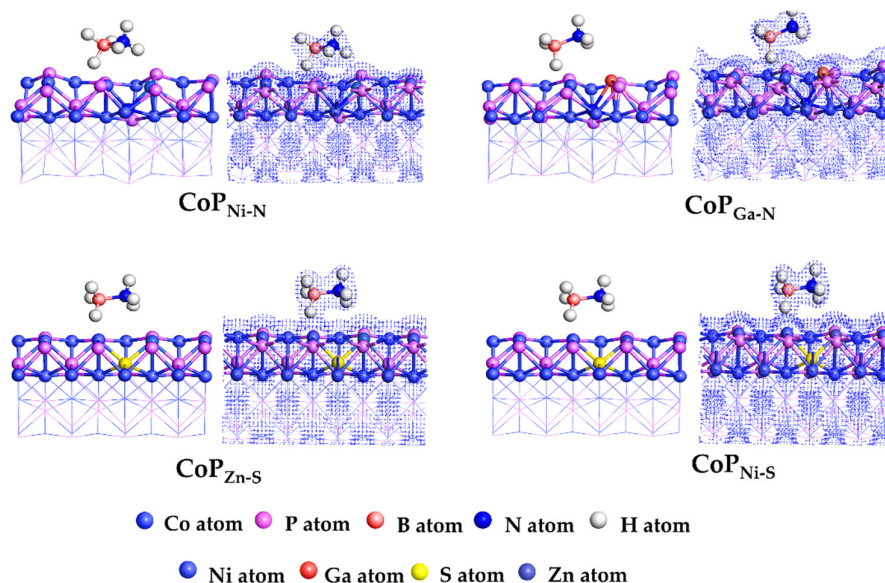

**Figure S1.** Stable structures and electron density maps of  $\text{NH}_3\text{BH}_3$  adsorbed on the surface of four different kinds of diatom-doped  $\text{CoP}$  catalysts ( $\text{CoP}_{\text{Ni-N}}$ ,  $\text{CoP}_{\text{Ga-N}}$ ,  $\text{CoP}_{\text{Ni-S}}$  and  $\text{CoP}_{\text{Zn-S}}$ ).

### The process of $\text{NH}_3\text{BH}_3$ hydrogen production catalyzed by $\text{CoP}$

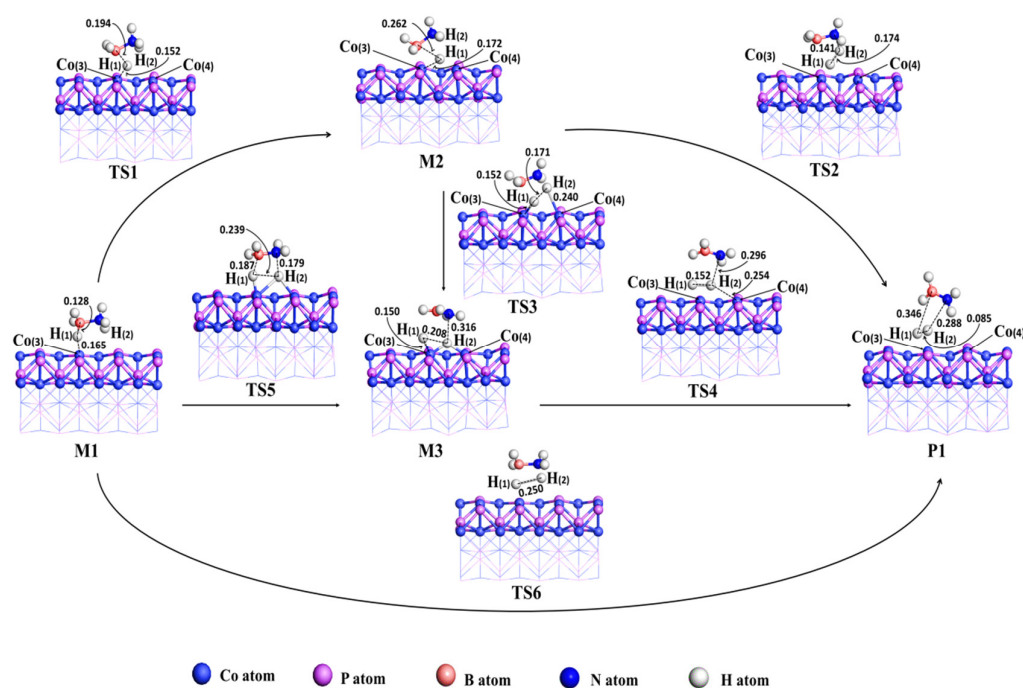

**Figure S2.** General flow chart of  $\text{NH}_3\text{BH}_3$  hydrogen production reaction on  $\text{CoP}$  (101) surface.

### The process of $\text{NH}_3\text{BH}_3$ hydrogen production catalyzed by $\text{CoP}_{\text{Ni-N}}$

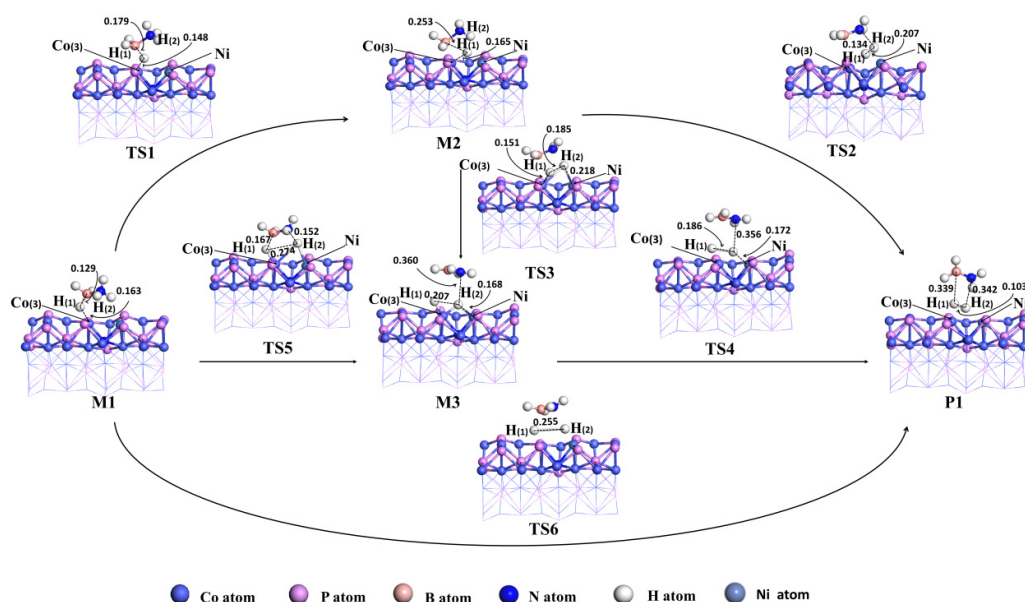

Figure S3. General flow chart of  $\text{NH}_3\text{BH}_3$  hydrogen production reaction on  $\text{CoP}_{\text{Ni-N}}$  (101) surface.

### The process of $\text{NH}_3\text{BH}_3$ hydrogen production catalyzed by $\text{CoP}_{\text{Ga-N}}$

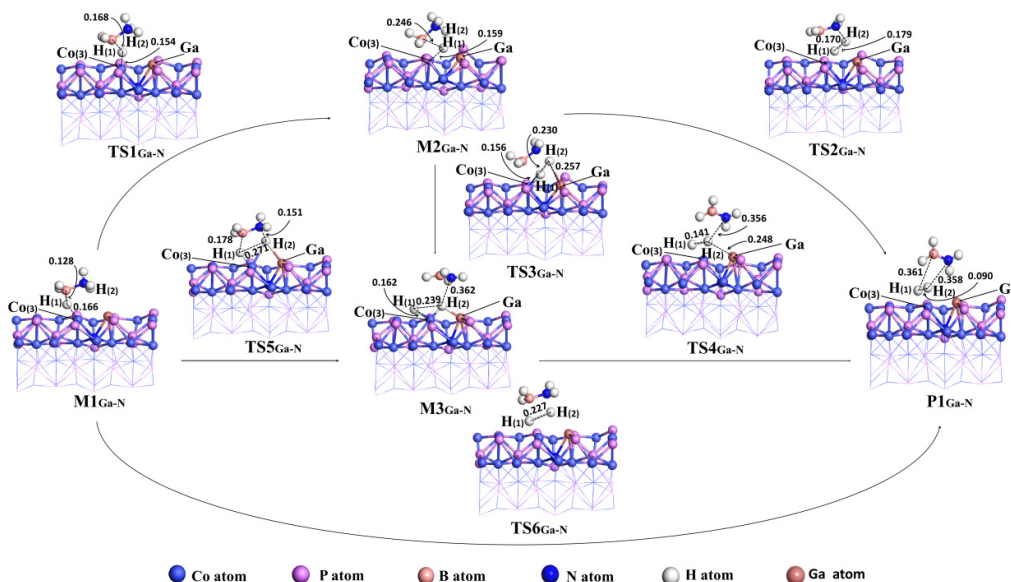

Figure S4. General flow chart of  $\text{NH}_3\text{BH}_3$  hydrogen production reaction on  $\text{CoP}_{\text{Ga-N}}$  (101) surface.

## The process of $\text{NH}_3\text{BH}_3$ hydrogen production catalyzed by $\text{CoP}_{\text{Ni-S}}$

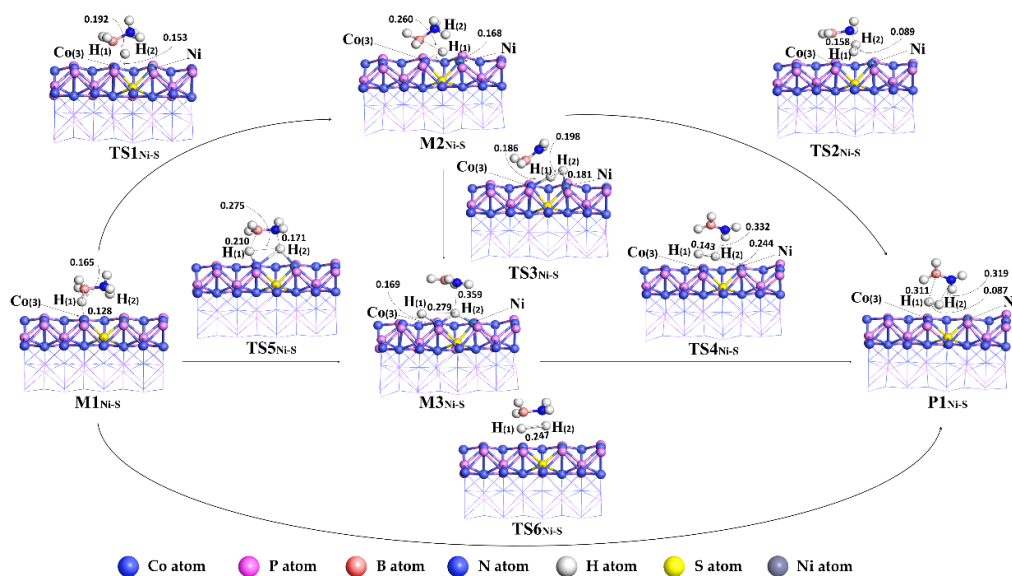

Figure S5. General flow chart of  $\text{NH}_3\text{BH}_3$  hydrogen production reaction on  $\text{CoP}_{\text{Ga-N}} (101)$  surface.

## Energy level diagram of the reaction of five catalysts

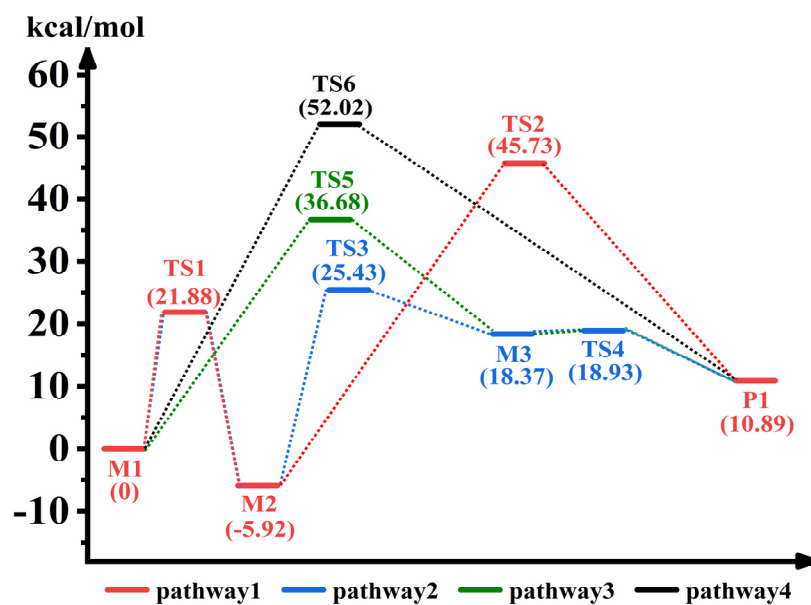

Figure S6. The energy profiles of  $\text{NH}_3\text{BH}_3$  dehydrogenation reaction catalyzed by  $\text{CoP}$ .

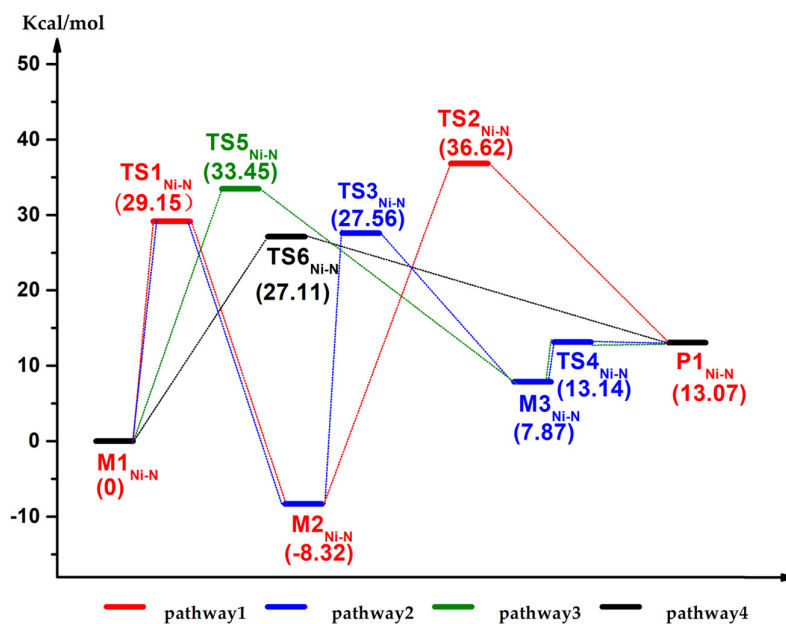

Figure S7. The energy profiles of  $\text{NH}_3\text{BH}_3$  dehydrogenation reaction catalyzed by  $\text{CoP}_{\text{Ni-N}}$ .

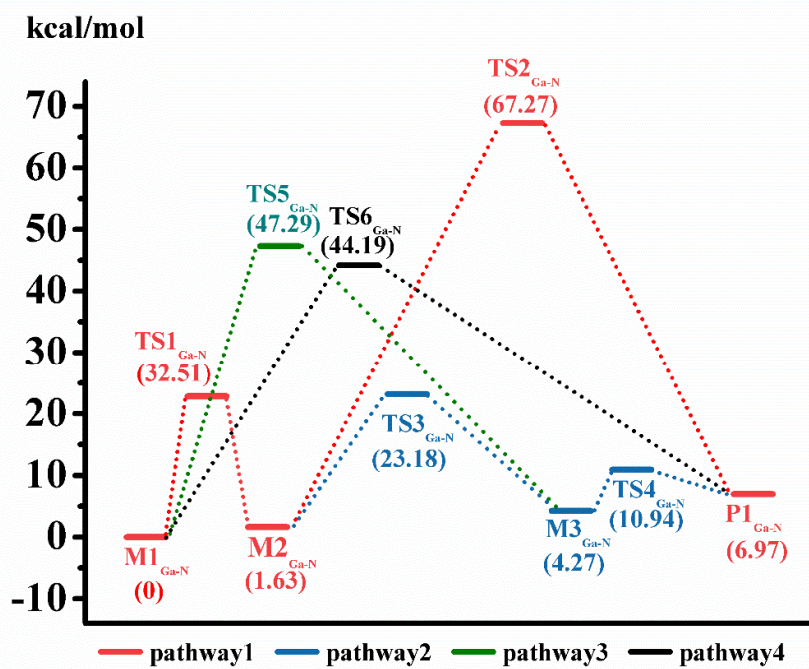

Figure S8. The energy profiles of  $\text{NH}_3\text{BH}_3$  dehydrogenation reaction catalyzed by  $\text{CoP}_{\text{Ga-N}}$ .



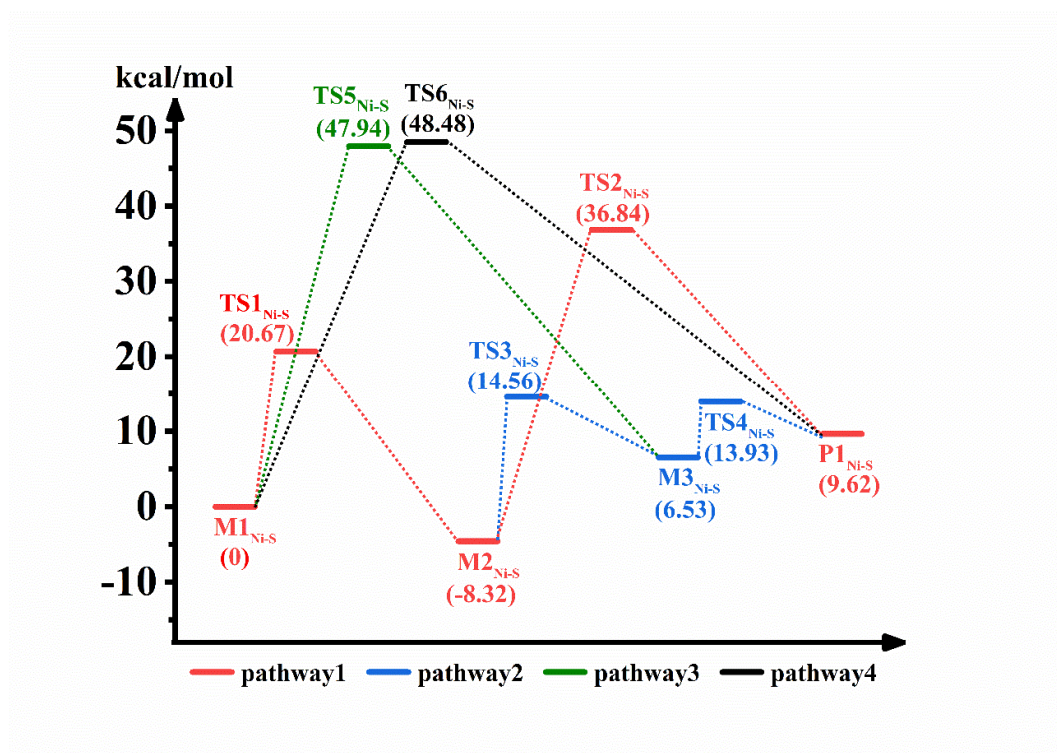

Figure S9. The energy profiles of  $\text{NH}_3\text{BH}_3$  dehydrogenation reaction catalyzed by  $\text{CoP}_{\text{Ga-N}}$ .

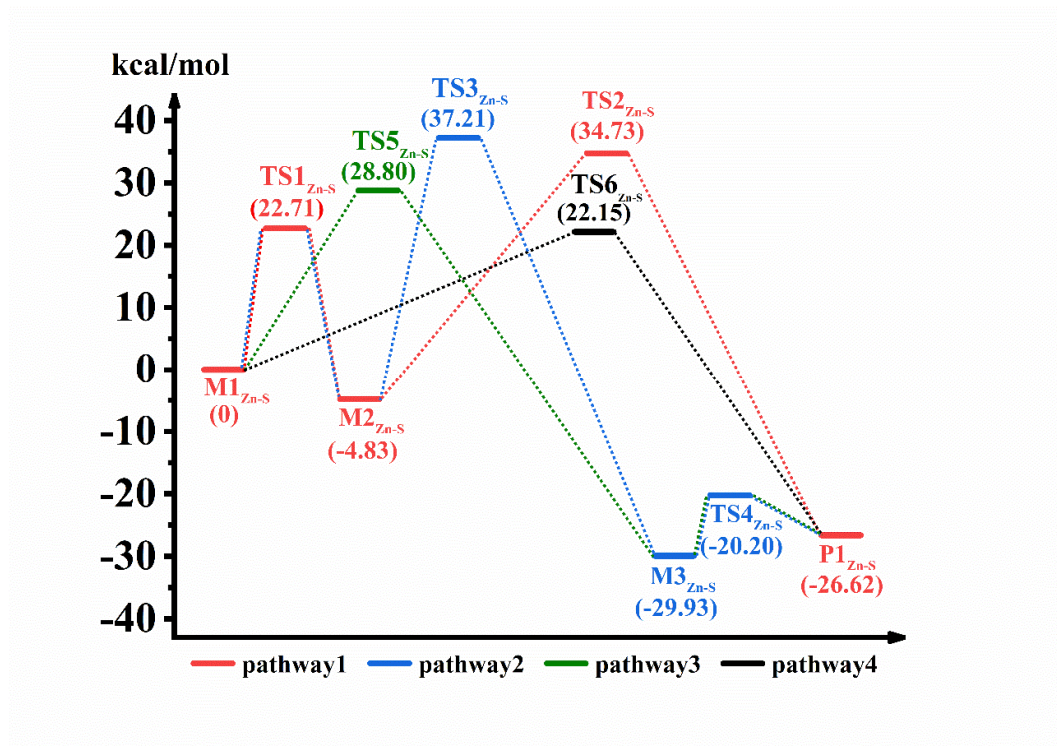

Figure S10. The energy profiles of  $\text{NH}_3\text{BH}_3$  dehydrogenation reaction catalyzed by  $\text{CoP}_{\text{Ga-N}}$ .

## Density of states (DOS) and energy band structure

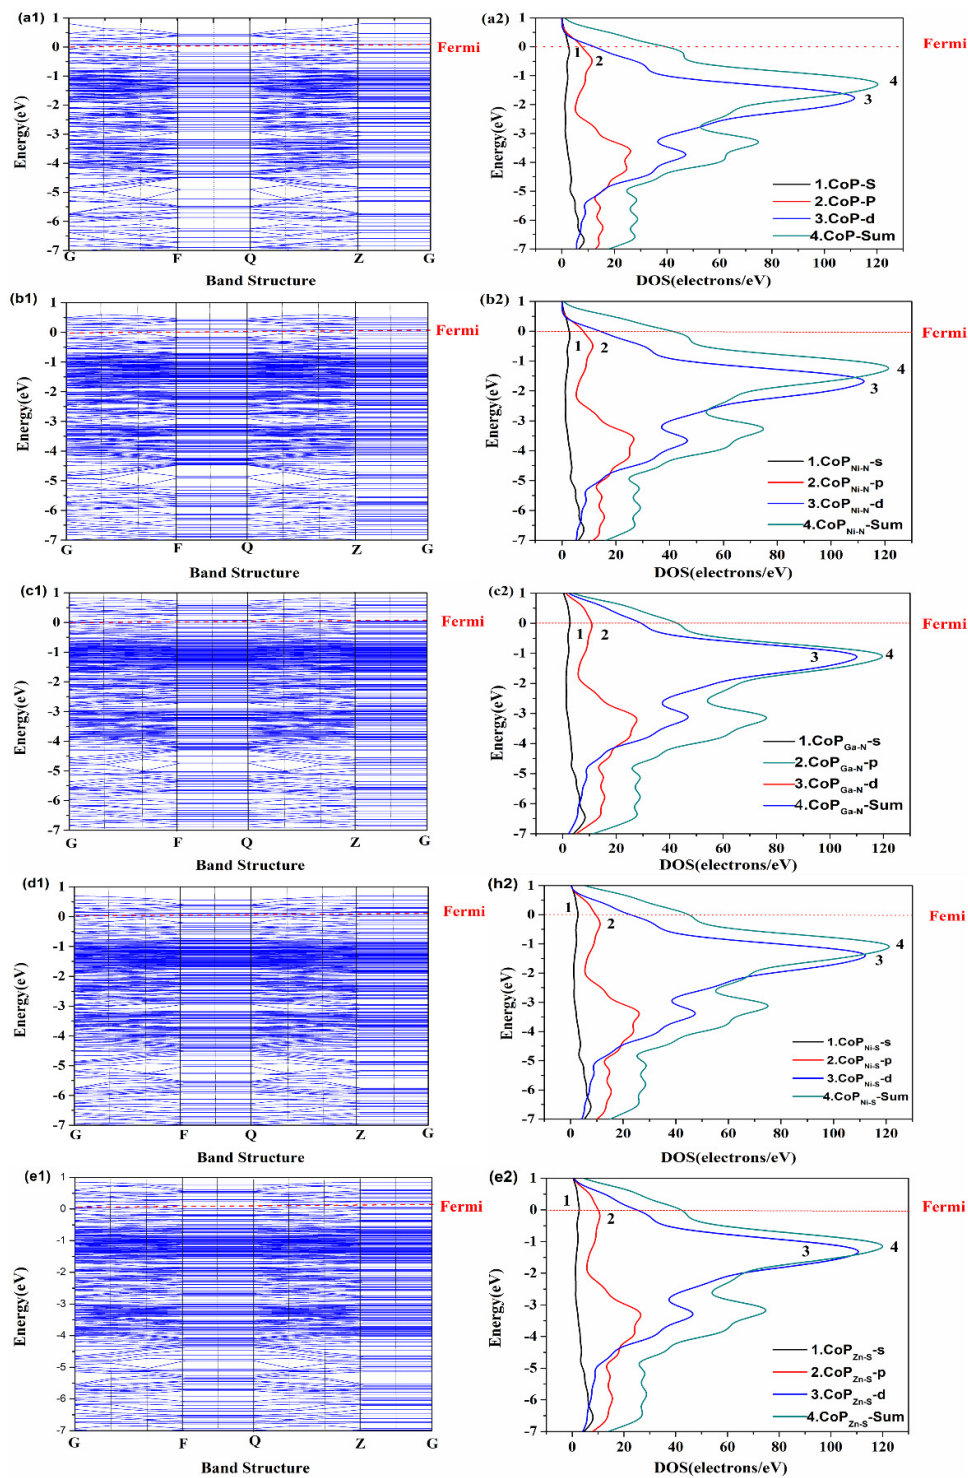

**Figure S11.** Schematic diagram of energy band structure (EBS) and density of states (DOS). (subscript 1 is EBS, subscript 2 is DOS, (a), (b), (c), (d), (e) refer to CoP, CoP<sub>Ni-N</sub>, CoP<sub>Ga-N</sub>, CoP<sub>Ni-S</sub>, CoP<sub>Zn-S</sub> respectively).

## Additional Tables.

### Relevant structural parameters related to the hydrogen evolution reaction

**Table S1.** Bond lengths (nm) of various sites in the reaction of  $\text{NH}_3\text{BH}_3$  catalyzed by CoP.

| pathway |     | B-H(1) | Co(3)-H(1) | N-H(2) | Co(3)-H(2) | Ni-H(2) | H(1)-H(2) |
|---------|-----|--------|------------|--------|------------|---------|-----------|
| I       | M1  | 0.128  | 0.165      | 0.103  | --         | --      | 0.276     |
|         | TS1 | 0.194  | 0.152      | 0.103  | --         | --      | 0.204     |
|         | M2  | 0.262  | 0.172      | 0.103  | --         | --      | 0.193     |
|         | TS2 | 0.277  | 0.233      | 0.174  | --         | --      | 0.141     |
|         | P1  | 0.346  | 0.165      | 0.288  | --         | --      | 0.085     |
| II      | M1  | --     | 0.165      | 0.103  | 0.345      | 0.303   | 0.276     |
|         | TS1 | --     | 0.152      | 0.103  | 0.337      | 0.314   | 0.204     |
|         | M2  | --     | 0.172      | 0.103  | 0.305      | 0.310   | 0.193     |
|         | TS3 | --     | 0.152      | 0.184  | 0.285      | 0.240   | 0.171     |
|         | M3  | --     | 0.150      | 0.316  | 0.168      | 0.173   | 0.208     |
|         | TS4 | --     | 0.148      | 0.296  | 0.153      | 0.254   | 0.152     |
| III     | P1  | --     | 0.165      | 0.288  | 0.164      | 0.360   | 0.085     |
|         | M1  | 0.128  | 0.165      | 0.103  | 0.345      | 0.303   | 0.276     |
|         | TS5 | 0.187  | 0.159      | 0.179  | 0.240      | 0.209   | 0.239     |
|         | M3  | 0.276  | 0.150      | 0.316  | 0.168      | 0.173   | 0.208     |
|         | TS4 | 0.306  | 0.148      | 0.296  | 0.153      | 0.254   | 0.152     |
| IV      | P1  | 0.346  | 0.165      | 0.288  | 0.164      | 0.360   | 0.085     |
|         | M1  | 0.128  | --         | 0.103  | --         | --      | 0.276     |
|         | TS6 | 0.169  | --         | 0.138  | --         | --      | 0.250     |
|         | P1  | 0.346  | --         | 0.288  | --         | --      | 0.085     |

**Table S2.** Bond lengths (nm) of various sites in the reaction of  $\text{NH}_3\text{BH}_3$  catalyzed by  $\text{CoP}_{\text{Ni-N}}$ .

|     |                            | B-H(1) | Co(3)-H(1) | N-H(2) | Co(3)-H(2) | Ni-H(2) | H(1)-H(2) |
|-----|----------------------------|--------|------------|--------|------------|---------|-----------|
| I   | $\text{M1}_{\text{Ni-N}}$  | 0.129  | 0.163      | 0.104  | --         | --      | 0.281     |
|     | $\text{TS1}_{\text{Ni-N}}$ | 0.179  | 0.148      | 0.102  | --         | --      | 0.195     |
|     | $\text{M2}_{\text{Ni-N}}$  | 0.253  | 0.165      | 0.104  | --         | --      | 0.207     |
|     | $\text{TS2}_{\text{Ni-N}}$ | 0.277  | 0.177      | 0.207  | --         | --      | 0.134     |
|     | $\text{P1}_{\text{Ni-N}}$  | 0.339  | 0.154      | 0.342  | --         | --      | 0.103     |
| II  | $\text{M1}_{\text{Ni-N}}$  | --     | 0.163      | 0.104  | 0.306      | 0.260   | 0.281     |
|     | $\text{TS1}_{\text{Ni-N}}$ | --     | 0.148      | 0.102  | 0.329      | 0.298   | 0.195     |
|     | $\text{M2}_{\text{Ni-N}}$  | --     | 0.165      | 0.104  | 0.312      | 0.283   | 0.207     |
|     | $\text{TS3}_{\text{Ni-N}}$ | --     | 0.151      | 0.202  | 0.270      | 0.218   | 0.185     |
|     | $\text{M3}_{\text{Ni-N}}$  | --     | 0.149      | 0.360  | 0.162      | 0.168   | 0.207     |
|     | $\text{TS4}_{\text{Ni-N}}$ | --     | 0.149      | 0.356  | 0.162      | 0.172   | 0.186     |
| III | $\text{P1}_{\text{Ni-N}}$  | --     | 0.154      | 0.342  | 0.161      | 0.191   | 0.103     |
|     | $\text{M1}_{\text{Ni-N}}$  | 0.129  | 0.163      | 0.104  | 0.306      | 0.260   | 0.281     |
|     | $\text{TS5}_{\text{Ni-N}}$ | 0.167  | 0.160      | 0.152  | 0.276      | 0.225   | 0.274     |
|     | $\text{M3}_{\text{Ni-N}}$  | 0.329  | 0.149      | 0.360  | 0.162      | 0.168   | 0.207     |
|     | $\text{TS4}_{\text{Ni-N}}$ | 0.327  | 0.149      | 0.356  | 0.162      | 0.172   | 0.186     |
| IV  | $\text{P1}_{\text{Ni-N}}$  | 0.339  | 0.154      | 0.342  | 0.161      | 0.191   | 0.103     |
|     | $\text{M1}_{\text{Ni-N}}$  | 0.129  | --         | 0.104  | --         | --      | 0.281     |
|     | $\text{TS6}_{\text{Ni-N}}$ | 0.168  | --         | 0.149  | --         | --      | 0.255     |
|     | $\text{P1}_{\text{Ni-N}}$  | 0.339  | --         | 0.342  | --         | --      | 0.103     |



**Table S3.** Bond lengths (nm) of various sites in the reaction of  $\text{NH}_3\text{BH}_3$  catalyzed by  $\text{CoP}_{\text{Ga-N}}$ .

| pathway |                     | B-H(1) | Co(3)-H(1) | N-H(2) | Co(3)-H(2) | Ni-H(2) | H(1)-H(2) |
|---------|---------------------|--------|------------|--------|------------|---------|-----------|
| I       | M1 <sub>Ni-S</sub>  | 0.128  | 0.165      | 0.104  | --         | --      | 0.276     |
|         | TS1 <sub>Ni-S</sub> | 0.192  | 0.153      | 0.104  | --         | --      | 0.206     |
|         | M2 <sub>Ni-S</sub>  | 0.260  | 0.168      | 0.104  | --         | --      | 0.201     |
|         | TS2 <sub>Ni-S</sub> | 0.273  | 0.187      | 0.158  | --         | --      | 0.089     |
|         | P1 <sub>Ni-S</sub>  | 0.311  | 0.162      | 0.319  | --         | --      | 0.087     |
| II      | M1 <sub>Ni-S</sub>  | --     | 0.165      | 0.104  | 0.315      | 0.272   | 0.276     |
|         | TS1 <sub>Ni-S</sub> | --     | 0.153      | 0.104  | 0.327      | 0.282   | 0.206     |
|         | M2 <sub>Ni-S</sub>  | --     | 0.168      | 0.104  | 0.306      | 0.281   | 0.201     |
|         | TS3 <sub>Ni-S</sub> | --     | 0.186      | 0.269  | 0.317      | 0.181   | 0.198     |
|         | M3 <sub>Ni-S</sub>  | --     | 0.169      | 0.359  | 0.172      | 0.176   | 0.279     |
|         | TS4 <sub>Ni-S</sub> | --     | 0.149      | 0.332  | 0.154      | 0.244   | 0.143     |
|         | P1 <sub>Ni-S</sub>  | --     | 0.162      | 0.319  | 0.164      | 0.271   | 0.087     |
| III     | M1 <sub>Ni-S</sub>  | 0.128  | 0.165      | 0.104  | 0.315      | 0.272   | 0.276     |
|         | TS5 <sub>Ni-S</sub> | 0.210  | 0.151      | 0.171  | 0.256      | 0.203   | 0.275     |
|         | M3 <sub>Ni-S</sub>  | 0.385  | 0.169      | 0.359  | 0.172      | 0.176   | 0.279     |
|         | TS4 <sub>Ni-S</sub> | 0.327  | 0.149      | 0.332  | 0.154      | 0.244   | 0.143     |
|         | P1 <sub>Ni-S</sub>  | 0.311  | 0.162      | 0.319  | 0.164      | 0.271   | 0.087     |
| IV      | M1 <sub>Ni-S</sub>  | 0.128  | --         | 0.104  | --         | --      | 0.276     |
|         | TS6 <sub>Ni-S</sub> | 0.163  | --         | 0.247  | --         | --      | 0.143     |
|         | P1 <sub>Ni-S</sub>  | 0.311  | --         | 0.319  | --         | --      | 0.087     |

**Table S4.** Bond lengths (nm) of various sites in the reaction of  $\text{NH}_3\text{BH}_3$  catalyzed by  $\text{CoP}_{\text{Ni-S}}$ .

| pathway |                     | B-H(1) | Co(3)-H(1) | N-H(2) | Co(3)-H(2) | Ni-H(2) | H(1)-H(2) |
|---------|---------------------|--------|------------|--------|------------|---------|-----------|
| I       | M1 <sub>Ga-N</sub>  | 0.128  | 0.166      | 0.103  | --         | --      | 0.265     |
|         | TS1 <sub>Ga-N</sub> | 0.168  | 0.154      | 0.104  | --         | --      | 0.222     |
|         | M2 <sub>Ga-N</sub>  | 0.246  | 0.159      | 0.105  | --         | --      | 0.245     |
|         | TS2 <sub>Ga-N</sub> | 0.269  | 0.155      | 0.170  | --         | --      | 0.179     |
|         | P1 <sub>Ga-N</sub>  | 0.361  | 0.158      | 0.358  | --         | --      | 0.090     |
| II      | M1 <sub>Ga-N</sub>  | --     | 0.166      | 0.103  | 0.304      | 0.296   | 0.265     |
|         | TS1 <sub>Ga-N</sub> | --     | 0.154      | 0.104  | 0.336      | 0.292   | 0.222     |
|         | M2 <sub>Ga-N</sub>  | --     | 0.159      | 0.105  | 0.337      | 0.298   | 0.245     |
|         | TS3 <sub>Ga-N</sub> | --     | 0.156      | 0.152  | 0.317      | 0.257   | 0.230     |
|         | M3 <sub>Ga-N</sub>  | --     | 0.162      | 0.362  | 0.158      | 0.190   | 0.239     |
|         | TS4 <sub>Ga-N</sub> | --     | 0.160      | 0.356  | 0.156      | 0.248   | 0.141     |
|         | P1 <sub>Ga-N</sub>  | --     | 0.158      | 0.358  | 0.158      | 0.278   | 0.090     |
| III     | M1 <sub>Ga-N</sub>  | 0.128  | 0.166      | 0.103  | 0.304      | 0.296   | 0.265     |
|         | TS5 <sub>Ga-N</sub> | 0.178  | 0.163      | 0.151  | 0.270      | 0.256   | 0.271     |
|         | M3 <sub>Ga-N</sub>  | 0.393  | 0.162      | 0.362  | 0.158      | 0.190   | 0.239     |
|         | TS4 <sub>Ga-N</sub> | 0.369  | 0.160      | 0.356  | 0.156      | 0.248   | 0.141     |
|         | P1 <sub>Ga-N</sub>  | 0.361  | 0.158      | 0.358  | 0.158      | 0.278   | 0.090     |
| IV      | M1 <sub>Ga-N</sub>  | 0.128  | --         | 0.103  | --         | --      | 0.265     |
|         | TS6 <sub>Ga-N</sub> | 0.191  | --         | 0.166  | --         | --      | 0.227     |
|         | P1 <sub>Ga-N</sub>  | 0.158  | --         | 0.358  | --         | --      | 0.090     |

## Relevant energies and activation energies hydrogen evolution in reaction

**Table S5.** The each position energies (E), relative energies ( $E_{\text{rel}}$ ) and activation energies ( $E_a$ ) of am-moborane reaction catalyzed by CoP.

| pathway   | compound | $E_{\text{rel}}$ | $E_a$    |
|-----------|----------|------------------|----------|
|           |          | kcal/mol         | kcal/mol |
| pathway I | M1       | 0.00             |          |
|           | TS1      | 21.88            | 21.88    |
|           | M2       | -5.92            |          |

|             |     |       |       |
|-------------|-----|-------|-------|
|             | TS2 | 45.73 | 51.65 |
|             | P1  | 10.89 |       |
| pathway II  | M1  | 0.00  |       |
|             | TS1 | 21.88 | 21.88 |
|             | M2  | -5.92 |       |
|             | TS3 | 25.43 | 31.35 |
|             | M3  | 18.37 |       |
|             | TS4 | 18.93 | 0.57  |
|             | P1  | 10.89 |       |
| pathway III | M1  | 0.00  |       |
|             | TS5 | 36.68 | 36.68 |
|             | M3  | 18.37 |       |
|             | TS4 | 18.93 | 0.57  |
|             | P1  | 10.89 |       |
| pathway IV  | M1  | 0.00  |       |
|             | TS6 | 52.02 | 52.02 |
|             | P1  | 10.89 |       |

**Table S6.** The each position energies (E), relative energies ( $E_{rel}$ ) and activation energies ( $E_a$ ) of am-borane reaction catalyzed by CoP<sub>Ni-N</sub>.

| pathway     | compound            | $E_{rel}$ | $E_a$    |
|-------------|---------------------|-----------|----------|
|             |                     | kcal/mol  | kcal/mol |
| pathway I   | M1 <sub>Ni-N</sub>  | 0.00      |          |
|             | TS1 <sub>Ni-N</sub> | 29.15     | 29.15    |
|             | M2 <sub>Ni-N</sub>  | -8.25     |          |
|             | TS2 <sub>Ni-N</sub> | 36.62     | 44.87    |
|             | P1 <sub>Ni-N</sub>  | 13.07     |          |
| pathway II  | M1 <sub>Ni-N</sub>  | 0.00      |          |
|             | TS1 <sub>Ni-N</sub> | 29.15     | 29.15    |
|             | M2 <sub>Ni-N</sub>  | -8.25     |          |
|             | TS3 <sub>Ni-N</sub> | 27.56     | 35.81    |
|             | M3 <sub>Ni-N</sub>  | 7.87      |          |
|             | TS4 <sub>Ni-N</sub> | 13.14     | 5.27     |
| pathway III | P1 <sub>Ni-N</sub>  | 13.07     |          |
|             | M1 <sub>Ni-N</sub>  | 0.00      |          |
|             | TS5 <sub>Ni-N</sub> | 33.45     | 33.45    |
|             | M3 <sub>Ni-N</sub>  | 7.87      |          |
|             | TS4 <sub>Ni-N</sub> | 13.14     | 5.27     |
| pathway IV  | P1 <sub>Ni-N</sub>  | 13.07     |          |
|             | M1 <sub>Ni-N</sub>  | 0.00      |          |
|             | TS6 <sub>Ni-N</sub> | 27.11     | 27.11    |
|             | P1 <sub>Ni-N</sub>  | 13.07     |          |

**Table S7.** The each position energies (E), relative energies ( $E_{rel}$ ) and activation energies ( $E_a$ ) of am-moborane reaction catalyzed by CoP<sub>Ga-N</sub>.

| pathway     | compound            | $E_{rel}$ | $E_a$    |
|-------------|---------------------|-----------|----------|
|             |                     | kcal/mol  | kcal/mol |
| pathway I   | M1 <sub>Ga-N</sub>  | 0.00      |          |
|             | TS1 <sub>Ga-N</sub> | 22.84     | 22.84    |
|             | M2 <sub>Ga-N</sub>  | 1.63      |          |
|             | TS2 <sub>Ga-N</sub> | 67.27     | 65.63    |
|             | P1 <sub>Ga-N</sub>  | 6.97      |          |
| pathway II  | M1 <sub>Ga-N</sub>  | 0.00      |          |
|             | TS1 <sub>Ga-N</sub> | 22.84     | 22.84    |
|             | M2 <sub>Ga-N</sub>  | 1.63      |          |
|             | TS3 <sub>Ga-N</sub> | 23.18     | 23.18    |
|             | M3 <sub>Ga-N</sub>  | 4.27      |          |
|             | TS4 <sub>Ga-N</sub> | 10.94     | 6.67     |
|             | P1 <sub>Ga-N</sub>  | 6.97      |          |
| pathway III | M1 <sub>Ga-N</sub>  | 0.00      |          |
|             | TS5 <sub>Ga-N</sub> | 47.29     | 47.29    |
|             | M3 <sub>Ga-N</sub>  | 4.27      |          |
|             | TS4 <sub>Ga-N</sub> | 10.94     | 6.67     |
|             | P1 <sub>Ga-N</sub>  | 6.97      |          |
| pathway IV  | M1 <sub>Ga-N</sub>  | 0.00      |          |
|             | TS6 <sub>Ga-N</sub> | 44.19     | 44.19    |
|             | P1 <sub>Ga-N</sub>  | 6.97      |          |

**Table S8.** The each position energies (E), relative energies ( $E_{rel}$ ) and activation energies ( $E_a$ ) of am-moborane reaction catalyzed by CoP<sub>Ni-S</sub>.

| pathway     | compound            | $E_{rel}$ | $E_a$    |
|-------------|---------------------|-----------|----------|
|             |                     | kcal/mol  | kcal/mol |
| pathway I   | M1 <sub>Ni-S</sub>  | 0.00      |          |
|             | TS1 <sub>Ni-S</sub> | 20.67     | 20.67    |
|             | M2 <sub>Ni-S</sub>  | -4.58     |          |
|             | TS2 <sub>Ni-S</sub> | 36.84     | 45.16    |
|             | P1 <sub>Ni-S</sub>  | 9.62      |          |
| pathway II  | M1 <sub>Ni-S</sub>  | 0.00      |          |
|             | TS1 <sub>Ni-S</sub> | 20.67     | 20.67    |
|             | M2 <sub>Ni-S</sub>  | -4.58     |          |
|             | TS3 <sub>Ni-S</sub> | 14.56     | 19.14    |
|             | M3 <sub>Ni-S</sub>  | 6.53      |          |
|             | TS4 <sub>Ni-S</sub> | 13.93     | 7.40     |
|             | P1 <sub>Ni-S</sub>  | 9.62      |          |
| pathway III | M1 <sub>Ni-S</sub>  | 0.00      |          |
|             | TS5 <sub>Ni-S</sub> | 47.94     | 47.94    |
|             | M3 <sub>Ni-S</sub>  | 6.53      |          |
|             | TS4 <sub>Ni-S</sub> | 13.93     | 7.40     |
|             | P1 <sub>Ni-S</sub>  | 9.62      |          |
| pathway IV  | M1 <sub>Ni-S</sub>  | 0.00      |          |
|             | TS6 <sub>Ni-S</sub> | 48.48     | 48.48    |
|             | P1 <sub>Ni-S</sub>  | 9.62      |          |
